# Supplementary material for: A multifunctional green antibacterial rapid hemostasis composite wound dressing for wound healing
Source: Royal Society of Chemistry journal article supplement (doi:10.1039/d1bm01185e), 2021-01-01
Supplement: d1bm01185e1.pdf [file d1bm01185e1.pdf]

**Supporting information**  
**for**  
**Multifunctional green antibacterial rapid hemostasis composite**  
**wound dressing for wound healing**

Wencheng Liang<sup>a,c</sup>, Qiaohui Lu<sup>b</sup>, Fan Yu<sup>c</sup>, Junyong Zhang<sup>a</sup>, Chuang Xiao<sup>a</sup>, Xiaoming Dou<sup>c</sup>, Yan Zhou<sup>b</sup>,

Xiumei Mo<sup>c</sup>, Jun Li<sup>d,\*</sup>, Meidong Lang<sup>a,\*</sup>

<sup>a</sup> Shanghai Key Laboratory of Advanced Polymeric Materials, Key Laboratory for Ultrafine Materials of Ministry of Education, School of Materials Science and Engineering, East China University of Science and Technology, 130 Meilong Road, Shanghai 200237, PR China

<sup>b</sup> State Key Laboratory of Bioreactor Engineering, School of biotechnology, East China University of Science and Technology, 130 Meilong Road, Shanghai 200237, PR China

<sup>c</sup> Center of Photonics & Bio-Medical Diagnosis, School of science, East China University of Science and Technology, 130 Meilong Road, Shanghai 200237, PR China

<sup>d</sup> Department of Orthopedics, Shanghai Tenth People's Hospital Affiliated to Tongji University, 301 Yanchang Road, Shanghai 200072, PR China

<sup>e</sup> State Key Laboratory for Modification of Chemical Fibers and Polymer Materials, College of Chemistry, Chemical Engineering and Biotechnology, Donghua University, Shanghai 201620, PR China

**contents**

|                                                                |    |
|----------------------------------------------------------------|----|
| 1. Preparation RBC and rich platelet suspension solution ..... | S2 |
| 2. SEM .....                                                   | S2 |
| 3. The photograph of hemolysis rate, BCI, RBC attachment ..... | S2 |
| Reference .....                                                | S3 |

### 1. Preparation RBC and rich platelet suspension solution

Fresh anticoagulation blood from rabbit ears was collected using an anticoagulant tube with 3.2 % sodium citrate and centrifuged at 1500 rpm for 10 min. Next, red blood cells (RBC) were washed by normal saline and centrifuged several times. Finally, RBC was stored in 2-8 °C refrigerator. <sup>1</sup>

Fresh anticoagulation blood from rabbit ears was collected using an anticoagulant tube and centrifuged at 1500 rpm for 10 min. The supernatant solution was platelet rich plasma solution and stored in 2-8 °C refrigerator. <sup>1,2</sup>

### 2. SEM

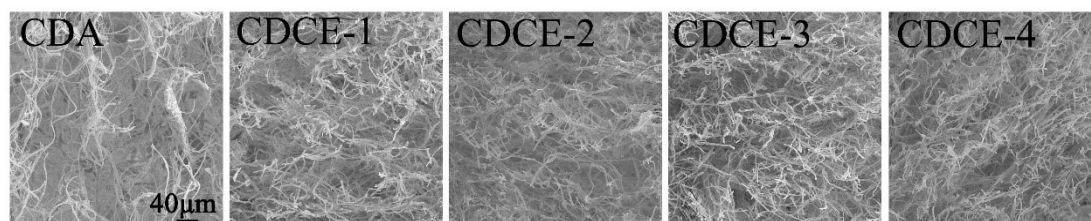

Fig S1. The morphology of CDA and CDCE wound dressing

### 3. The photograph of hemolysis rate, BCI, RBC attachment

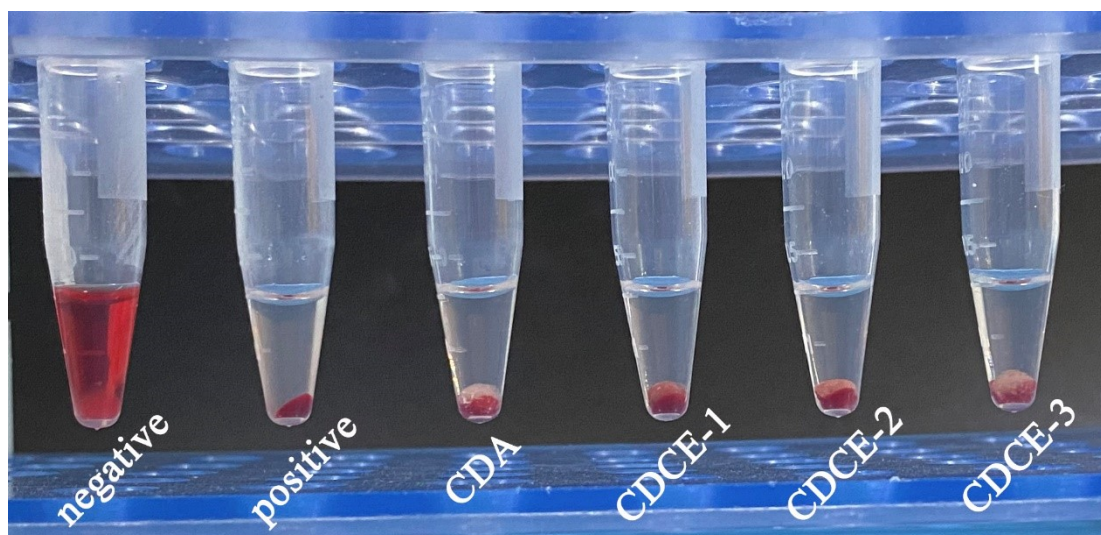

Fig S2. The photograph of hemolysis rate of wound dressing

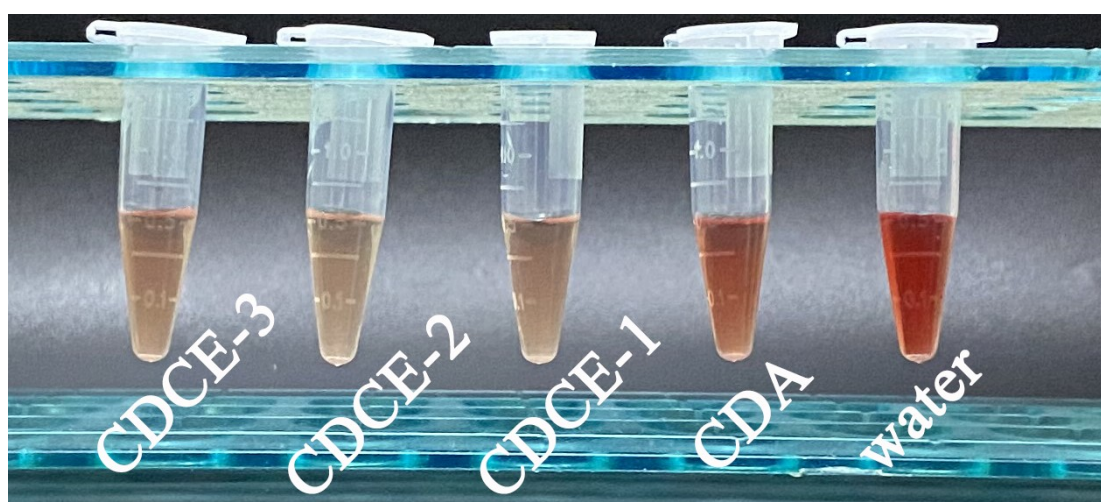

Fig S3. The photograph of BCI of wound dressing

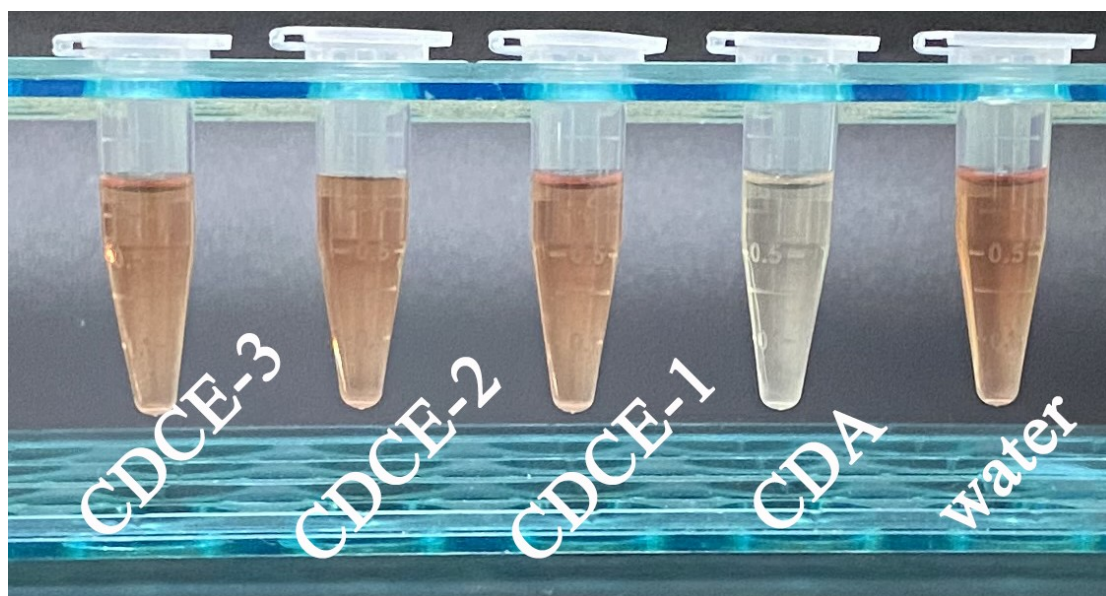

**Fig S4.** The photograph of RBC attachment of wound dressing

#### Reference

1. C.Y. Sun, X.L. Zeng, S.H. Zheng, Y.L. Wang, Z.Y. Li, H.N. Zhang, L.L. Nie, Y.F. Zhang, Y.B. Zhao, X.L. Yang, *Chem. Eng. J.*, 2022, **427**, 130843.
2. Sara Pourshahrestani, Ehsan Zeimaran, Nahrizul Adib Kadri, Nicola Gargiulo, Shani Samuel, Sangeetha Vasudevaraj Naveen, Tunku Kamarul, Mark R. Towler, *J. Mater. Chem. B*, 2016, **4**, 71-86.
